# Supplementary material for: Mechanism of alkene aziridination in the [(biaryldiimine)CuI] catalyst system; precise substrate orientation via two-centre binding
Source: Royal Society of Chemistry journal article supplement (doi:10.1039/b101415n), 2001-01-01
Supplement: b101415n.doc [file b101415n.doc]

**Enantioselective alkene aziridination in the [(biaryldiimine)CuI] catalyst system; precise substrate orientation *via* two-centre binding**

Kevin M. Gillespie, Edward J. Crust, Robert J Deeth,* and Peter Scott*

*Department of Chemistry, University of Warwick, Coventry, CV4 7AL, UK.*

### Experimental and theoretical details

NMR spectra were obtained on a Bruker DMX300 spectrometer.

**Preparation of (*2S*,*3R*)-*N*-*p*-toluenesulphonyl-2-carbo-(2-methyl-2-propoxy)-3-phenyl aziridine**

[Cu(CH3CN)4][BF4] (8 mg, 0.025 mmol), the ligand, L, (16 mg, 0.026 mmol) and butyl cinnamate (200 mg, 1.0 mmol) were placed in a 25-ml round-bottom flask which was purged with argon. Dry CH2Cl2 (8 ml) was added. After 30 min at –40°C, PhINTs, (186 mg, 0.5 mmol) was added. The reaction was stirred until all the PhINTs in suspension had disappeared. The solution was passed through a plug of silica to remove the catalyst. The aziridine was purified by column chromatography [silica gel 60, hexane:diethyl ether (4:1)]. Pale, off-white solid, 144 mg, 77%. m.p. =55‑57˚C. IR (NaCl plates) νmax 3026, 2981, 2937, 1739, 1600, 1350, 1160, 1084, 909 cm‑1. 1H NMR (CDCl3) δ 1.47 (9 H, s, (‑C(C**H**3)3), 2.34 ( 3H, s, SO2‑Ar‑C**H**3), 3.34 (1 H, d, *J*= 4.0 Hz, Ph‑C**H**‑CH), 4.31 (1 H, d, *J*=4.0 Hz, Ph‑CH‑C**H**), 7.19 (5 H, m, Ph‑**H** and SO2‑Ar‑**H**), 7.73 (2 H, d, *J*=8.3 Hz, SO2‑Ar‑**H**). 13C NMR (CDCl3) δ 20.59 (SO2‑Ar‑**C**H3), 26.82 (‑C(**C**H3)3),46.58 (Ph‑**C**H‑CH), 47.65 (Ph‑CH‑**C**H), 82.49 (‑**C**(CH3)3), 126.17, (Ar), 126.35 (Ar), 127.53(Ar), 127.74 (Ar), 128.49 (Ar), 132.13 (Ar), 136.56 (Ar), 143.07 (Ar), 163.55 (**C**=O). Mass Spec (CI) *m*/*z* =-391 (M+NH4+), 374 (M+H+). Enantiomeric excess determined by 1H NMR using Eu(hfc)3, ee = 89%. [α]D25 = ‑49.2° (c 1.00, CH2Cl2),

**(*2S*,*3R*)-*N*-*p*-toluenesulphonyl-2-carbo-(2-methyl-2-propoxy)-3-(4-methyl)phenyl aziridine**

Yellow oil. 114.3 mg, 59%. IR (NaCl plates) νmax 2978, 2931, 1738, 1597, 1336, 1162, 1088, 921, 813, 677. 1H NMR (CDCl3) δ 1.46 (9 H, s, (‑C(C**H**3)3), 2.24 (3 H, s, Ar‑C**H**3), 2.33 ( 3H, s, SO2‑Ar‑C**H**3), 3.35 (1 H, d, *J*= 4.0 Hz, Ar‑C**H**‑CH), 4.26 (1 H, d, *J*=4.0 Hz, Ar‑CH‑C**H**), 7.05 (4 H, m, Ar‑**H**),7.19 (2 H, d, *J*= 8.5 Hz, SO2‑Ar‑**H**), 7.71 (2 H, d, *J*=8.5 Hz, SO2‑Ar‑**H**). 13C NMR (CDCl3) δ 21.60 (Ar‑**C**H3), 22.00 (SO2‑Ar‑**C**H3), 28.24 (‑C(**C**H3)3), 48.20 (Ar‑**C**H‑CH), 48.71 (Ar‑CH‑**C**H), 83.81 (‑**C**(CH3)3), 127.64, (Ar), 127.74 (Ar), , 129.62 (Ar), 129.88 (Ar), 130.33 (Ar), 138.05 (Ar), 139.12 (Ar) 144.41 (Ar), 165.14 (**C**=O). Mass Spec (EI) *m*/*z* = 387 (M+), 332 (M‑C4H8). HRMS (CI) *m*/*z* = 388.1589, calcd [M++1] 388.1601. Enantiomeric excess determined by 1H NMR using Eu(hfc)3, ee = 88%, [α]D30 = ‑18.9° (c 0.84, CH2Cl2).

**(*2S*,*3R*)-*N*-*p*-toluenesulphonyl-2-carbo-(2-methyl-2-propoxy)-3-(4-methoxy)phenyl aziridine**

Yellow oil. 136.7 mg, 67%. IR (NaCl plates) νmax 2977, 2927, 1746, 1614, 1516, 1368, 1332, 1253, 1161, 1091, 1032, 816. 1H NMR (CDCl3) δ 1.15 (9 H, s, (‑C(C**H**3)3), 2.42 (3H, s, SO2‑Ar‑C**H**3), 3.56 (1 H, d, *J*= 7.6 Hz, Ar‑C**H**‑CH), 3.74 (3 H, s, Ar‑OC**H**3), 4.29 (1 H, d, *J*=7.6 Hz, Ar‑CH‑C**H**), 6.78 (2 H, dd, *J*=6.7, 1.8 Hz, Ar‑**H**),7.22 (2 H, dd, *J*= 6.7, 1.8 Hz, Ar‑**H**), 7.33 (2 H, d, *J*=8.2 Hz, SO2‑Ar‑**H**), 7.90 (2H, d, *J*=8.2 Hz, SO2‑Ar‑**H**). 13C NMR (CDCl3) δ 22.10 (SO2‑Ar‑**C**H3) 28.06 (‑C(**C**H3)3), 44.67 (Ar‑**C**H‑CH), 45.18 (Ar‑CH‑**C**H), 55.66 (Ar‑O**C**H3), 83.72 (‑**C**(CH3)3), 113.91, (Ar), 128.43 (Ar), , 129.16 (Ar), 130.19 (Ar), 163.97 (**C**=O). Mass Spec (EI) *m*/*z* = 403 (M+), 347(M‑C4H8+), 330 (M‑OC4H9). HRMS (CI) *m*/*z* = 404.1534, calcd [M++1] 404.1550. Enantiomeric excess determined by HPLC, Chiralcel OD, 15 cm x 0.46 cm i.d. Mobile phase:- hexane:propan-2-ol (95:5), *t*r (major) = 16.41 min, *t*r (minor) = 20.17 min, ee = 93%.. [α]D26 = +30.4° (c 1.06, CH2Cl2).

**(*2S*,*3R*)-*N*-*p*-toluenesulphonyl-2-carbo-(2-methyl-2-propoxy)-3-(4-fluoro)phenyl aziridine**

Yellow oil. 130.0 mg, 66%. IR (NaCl plates) νmax 2982, 1732, 1608, 1515, 1336, 1222, 1088, 925, 814, 738, 690 cm‑1. 1H NMR (CDCl3) δ 1.52 (9 H, s, (‑C(C**H**3)3), 2.40 (3 H, s, SO2‑Ar‑C**H**3), 3.39 (1 H, d, *J*= 4.0 Hz, Ph‑C**H**‑CH), 4.33 (1 H, d, *J*=4.0 Hz, Ph‑CH‑C**H**), 6.97 (2 H, dd, *J*= 8.5 Hz, Ar‑**H**),7.17‑7.28 (4 H, m, Ar‑**H** and SO2‑Ar‑**H**), 7.77 (2 H, d, *J*=8.5 Hz, SO2‑Ar‑**H**). 13C NMR (CDCl3) δ 20.59 (SO2‑Ar‑**C**H3), 26.81 (‑C(**C**H3)3), 45.92 (Ph‑**C**H‑CH), 47.46 (Ph‑CH‑**C**H), 82.61 (‑**C**(CH3)3), 114.43 (Ar), 114.72 (Ar), , 126.46 (Ar), 128.03 (Ar), 128.14 (Ar), 128.54 (Ar), 136.39 (Ar) 143.24 (Ar), 163.54 (**C**=O). Mass Spec (CI) *m*/*z* = 409 (MNH4+), 392 (MH+). HRMS (CI) *m*/*z* = 392.1337, calcd [M++1] 392.1351. Enantiomeric excess determined by HPLC, Chiralcel OD, 15 cm x 0.46 cm i.d. Mobile phase: hexane:propan-2-ol (95:5), *t*r (major) = 15.56 min, *t*r (minor) = 19.37 min. ee = 98%, [α]D30 = ‑42.2° (c 0.25, CH2Cl2).

**(*2S*,*3R*)-*N*-*p*-toluenesulphonyl-2-carbo-(2-methyl-2-propoxy)-3-(4-chloro)phenyl aziridine**

Yellow oil. 174 mg, 89%. IR (NaCl plates) νmax 2980, 2931, 1738, 1598, 1495, 1339, 1164, 1090, 915, 814, 731, 686 cm‑1. 1H NMR (CDCl3) δ 1.52 (9 H, s, (‑C(C**H**3)3), 2.40 (3 H, s, SO2‑Ar‑C**H**3), 3.36 (1 H, d, *J*= 4.0 Hz, Ar‑C**H**‑CH), 4.32 (1 H, d, *J*=4.0 Hz, Ar‑CH‑C**H**), 7.15 (2 H, dd, *J*= 8.9 Hz, Ar‑**H**),7.17‑7.28 (4 H, m, Ar‑**H** and SO2‑Ar‑**H**), 7.77 (2 H, d, *J*=8.6 Hz, SO2‑Ar‑**H**). 13C NMR (CDCl3) δ 20.60 (SO2‑Ar‑**C**H3), 26.80 (‑C(**C**H3)3), 45.77 (Ar‑**C**H‑CH), 47.65 (Ar‑CH‑**C**H), 82.68 (‑**C**(CH3)3), 126.32 (Ar), 127.55 (Ar), 128.57 (Ar), 130.67 (Ar), 133.71 (Ar), 136.38 (Ar), 143.24 (Ar), 163.29 (**C**=O). Mass Spec (CI) *m*/*z* = 428 (MNH4+), 408 (MH+). HRMS (CI) *m*/*z* = 408.1041, calcd [M++1] 408.1055. Enantiomeric excess determined by HPLC Chiralcel OD 15 cm x 0.46 cm i.d. Mobile phase: hexane:propan-2-ol (95:5), *t*r (major) 8.99 min, *t*r (minor) = 10.43 min. ee = 93%.. [α]D26 = ‑41.0° (c 0.66, CH2Cl2)

**(*2S*,*3R*)-*N*-*p*-toluenesulphonyl-2-carbo-(2-methyl-2-propoxy)-3-(4-bromo)phenyl aziridine**

Colourless oil. 130 mg, 57%. IR (NaCl plates) νmax 2980, 2928, 1738, 1597, 1338, 1163, 1087, 916, 812 cm‑1. 1H NMR (CDCl3) δ 1.53 (9 H, s, (‑C(C**H**3)3), 2.41 (3 H, s, Ar‑C**H**3), 3.36 (1 H, d, *J*= 4.0 Hz, Ar‑C**H**‑CH), 4.31 (1 H, d, *J*=4.0 Hz, Ar‑CH‑C**H**), 7.09 (2 H, dd, *J*= 6.7, 1.8 Hz, Ar‑**H**),7.27 (2 H, d, *J*=8.2 Hz, SO2‑Ar‑**H**), 7.41 (2 H, dd, *J*=6.7, 1.8 Hz, Ar‑**H**), 7.79 (2 H, d, *J*=8.2 Hz, SO2‑Ar‑**H**). 13C NMR (CDCl3) δ 22.02 (SO2‑Ar‑**C**H3), 28.22 (‑C(**C**H3)3), 47.22 (Ar‑**C**H‑CH), 49.08 (Ar‑CH‑**C**H), 84.12 (‑**C**(CH3)3), 123.29 (Ar), 127.74 (Ar), 129.23 (Ar), 129.99 (Ar), 132.14 (Ar), 132.65 (Ar), 137.79 (Ar), 144.71 (Ar) 164.68 (**C**=O). Mass Spec (CI):- *m*/*z* = 452/454 (MH+). HRMS (CI) *m*/*z* = 452.0525, calcd [M++1] 452.0550. Enantiomeric excess determined by HPLC, Chiralcel OD 15 cm x 0.46 cm i.d. Mobile phase: hexane:propan-2-ol (95:5), *t*r (major) 15.89 min, *t*r (minor) = 23.21 min. ee = 98%. [α]D30 = ‑41.8° (c 0.33, CH2Cl2).

**(*2S*,*3R*)-*N*-*p*-toluenesulphonyl-2-carbo-(2-methyl-2-propoxy)-3-(3-methyl)phenyl aziridine**

Yellow oil. 109 mg, 56%. IR (NaCl plates) νmax 2979, 2926, 1736, 1638, 1337, 1163, 1087, 784, 690 cm‑1. 1H NMR (CDCl3) δ 1.53 (9 H, s, (‑C(C**H**3)3), 2.28 (3 H, s, Ar‑C**H**3), 2.40 (3H, s, SO2‑Ar‑C**H**3), 3.39 (1 H, d, *J*= 4.0 Hz, Ar‑C**H**‑CH), 4.31 (1 H, d, *J*=4.0 Hz, Ar‑CH‑C**H**), 6.99‑7.28 (6 H, m, Ar‑**H** and SO2‑Ar‑**H** ), , 7.78 (2 H, d, *J*=8.6 Hz, SO2‑Ar‑**H**). 13C NMR (CDCl3) δ 20.76 (Ar‑**C**H3), 20.58 (SO2‑Ar‑**C**H3), 26.82 (‑C(**C**H3)3), 46.60 (Ar‑**C**H‑CH), 47.52 (Ar‑CH‑**C**H), 82.42 (‑**C**(CH3)3), 123.17 (Ar), 126.39 (Ar), 126.95 (Ar), 127.43 (Ar), 128.46 (Ar), 128.50 (Ar), 132.00 (Ar), 136.53 (Ar), 137.25 (Ar), 143.03 (Ar), 163.60 (**C**=O). Mass Spec (CI) *m*/*z* = 405 (M+NH4+), 388 (M+H+). HRMS (CI) *m*/*z* = 388.1581, calcd [M++1] 388.1601. Enantiomeric excess determined by 1H NMR using Eu(hfc)3, ee = 96%. [α]D28 = ‑19.9° (c 0.24, CH2Cl2).

**(*2S*,*3R*)-*N*-*p*-toluenesulphonyl-2-carbo-(2-methyl-2-propoxy)-3-(3-nitro)phenyl aziridine**

Yellow oil. 109 mg, 56%. IR (NaCl plates) νmax 2964, 2929, 1730, 1597, 1532, 1439, 1260, 1162, 108, 803, 737, 679 cm‑1. 1H NMR (CDCl3) δ 1.54 (9 H, s, (‑C(C**H**3)3), 2.41 (3 H, s, SO2‑Ar‑C**H**3), 3.41 (1 H, d, *J*= 4.0 Hz, Ar‑C**H**‑CH), 4.42 (1 H, d, *J*=4.0 Hz, Ar‑CH‑C**H**), 7.30 (2 H, d, *J*=8.2 Hz, SO2‑Ar‑**H** ), 7.45(1 H, dd, *J*=7.6 Hz, Ar‑**H**), 7.58 (1 H, dd, *J*= 7.6 Hz, Ar‑**H**), 7.78 (2 H, d, *J*=8.2 Hz, SO2‑Ar‑**H** ), 8.03 (1 H, s, Ar‑**H**), 8.13 (1 H, dd, *J*=8.3 Hz, Ar‑H). 13C NMR (CDCl3) 20.63 (SO2‑Ar‑**C**H3), 26.80 (‑C(**C**H3)3), 44.84 (Ar‑**C**H‑CH), 47.93 (Ar‑CH‑**C**H), 83.06 (‑**C**(CH3)3), 121.17 (Ar), 121.35 (Ar), 122.68 (Ar), 122.84 (Ar), 126.43 (Ar), 126.55 (Ar), 128.70 (Ar), 132.35 (Ar), 132.56 (Ar), 134.60 (Ar), 143.70 (Ar), 163.40 (**C**=O). Mass Spec (CI) *m*/*z* = 405 (M+NH4+), 388 (M+H+). HRMS (CI) *m*/*z* = 419.1282, calcd [M++1] 419.2288. Enantiomeric excess determined by HPLC, Chiralcel OD, 15 cm x 0.46 cm i.d. Mobile phase: hexane:propan-2-ol (98:2), *t*r (major) 35.65 min, *t*r (minor) = 39.79 min, ee = 96%, [α]D30 = ‑53.8° (c 0.41, CH2Cl2).

**Calculations**

All DFT calculations employed the Amsterdam Density Functional program version 2.3. Geometries were optimised at the Local Density Approximation level using internal coordinates with the angular convergence criterion raised from the default value of 0.5° to 2°. Binding energies were computed with the BP86 gradient corrected functional. Basis sets were triple- plus polarisation STO expansions on Cu, double- plus polarisation on the ligand donor atoms and double- on the remaining centres. The size of the systems and the lack of analytical second derivatives in ADF precluded frequency calculations to confirm that the optimised structures are true local minima.

The second structure (*ca*. 2 kJ higher in energy) is similar to that in Figure 3(a) with the exception that the Ts–N=Cu unit is oriented so that the Ts group points away from the chiral ligand (fig3a-alternate.pdb). Preliminary DFT investigations indicate that the subsequent reaction of this species with alkenes is a significantly higher energy process because of steric effects.

Optimised structures are available in PDB format. The structures shown in Figure 3 are labelled fig3a.pdb, fig3b.pdb and fig3c.pdb. The alternative orientation of the tosyl group for 3a and 3b are labelled fig3a-alternate.pdb and fig3b-alternate.pdb respectively. The three complexes with coordinated styrene are labelled according to which site is occupied by the Ph group. Only sites **b**, **c** and **d** were considered giving styrene-site-b.pdb, styrene-site-c.pdb and styrene-site-d.pdb.
